# Supplementary material for: Cyclic oligoadenylate signalling mediates Mycobacterium tuberculosis CRISPR defence
Source: PubMed Central journal article supplement (PMC6755085; doi:10.1093/nar/gkz676), 2019-08-08
Supplement: gkz676_supplemental_file.pdf [file gkz676_supplemental_file.pdf]

# Cyclic oligoadenylate signalling mediates *Mycobacterium tuberculosis* CRISPR defence

## Supplementary Information – Grüşchow et al.

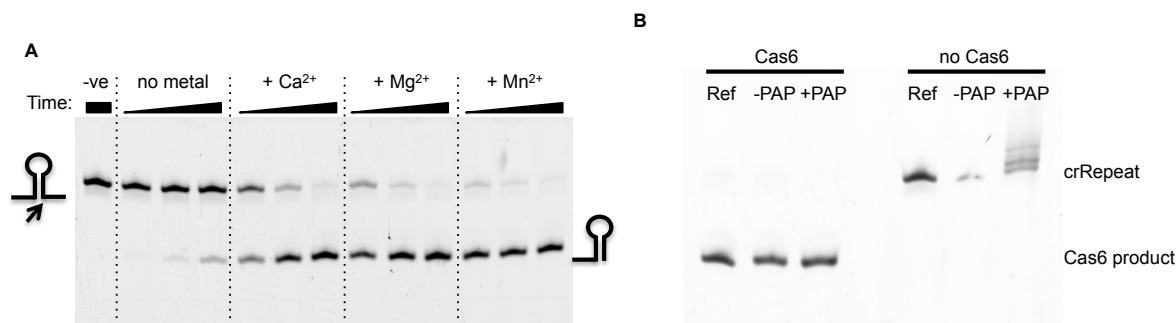

**Figure S1 The Cas6 ribonuclease cleaves the *Mtb* CRISPR repeat sequence to generate crRNA.**

(A) Cas6 (0.5 μM) was incubated with 50 nM 5'-FAM CRISPR repeat RNA at 37 °C for 5, 15, 45 min in 20 mM Tris, 100 mM potassium glutamate, pH 7.5 in the absence or presence of 5 mM divalent metal ions as indicated. Reactions were stopped by phenol-chloroform extraction. (B) Cas6 cleavage leaves a 3'-(cyclic) phosphate group. CRISPR repeat RNA (crRepeat, 5'-FAM labeled, 400 nM) was digested with 2 μM Cas6 for 1 h in the presence of Mg<sup>2+</sup> using the same reaction conditions as before. Phenol-chloroform followed by chloroform extraction provided the substrate for the *E. coli* Poly(A) polymerase (PAP, New England Biolabs) reaction. Polyadenylation was performed according to the manufacturer's instructions. In a parallel experiment, Cas6 was omitted. The CRISPR repeat RNA but not the Cas6 product can be 3'-polyadenylated by PAP. This suggests that the reaction product has a cyclic 2',3'-phosphate, as observed for other Cas6 enzymes. This observation, together with the observation that calcium supports enhanced cleavage of the CRISPR repeat, suggests that the metal ion does not participate directly in catalysis but rather plays a role in stabilisation of the RNA substrate or RNA:protein complex. For these experiments, lanes labelled "Ref" show RNA before polyadenylation while -PAP and +PAP show RNA incubated in polyadenylation buffer in the absence and presence of Poly(A) polymerase, respectively.

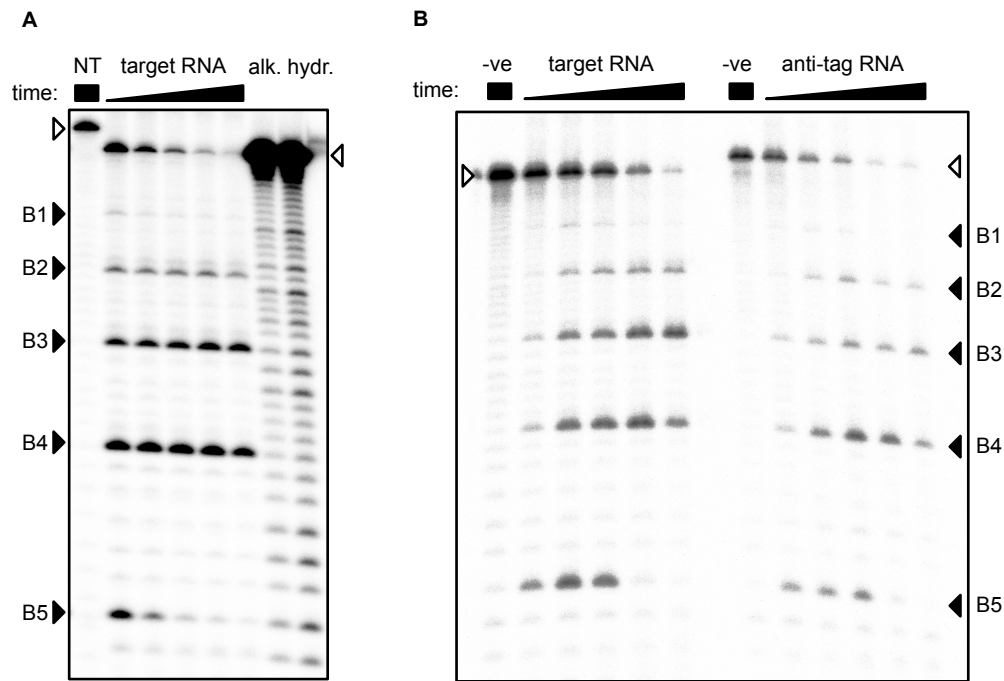

**Figure S2. RNA backbone cleavage by Csm interference complex.**

**(A)** 5'-<sup>32</sup>P-labeled target RNA or non-target (NT) RNA were treated with 0.8 μM Csm effector complex for 5, 15, 30, 60, 120 min. Reactions were analysed by denaturing PAGE alongside alkaline hydrolysis ladders prepared from target RNA. **(B)** Target RNA and anti-tag RNA (full-length complementarity to crRNA including repeat-derived 5'-handle) are both cleaved by Csm to give identical products. Reaction time: 0.5, 2, 5, 30, 100 min; substrate RNA is indicated by unfilled triangles; the five cleavage sites (B1 – B5) with the characteristic 6 nt spacing are indicated by filled triangles. Target RNA with a 4 nt truncation at the 3'-end was used, leading to a different distribution of cleavage products compared to Figure 2. It is not clear why product B5 is depleted over time in these gels but not in figure 2, and this phenomenon could be followed up in future studies.

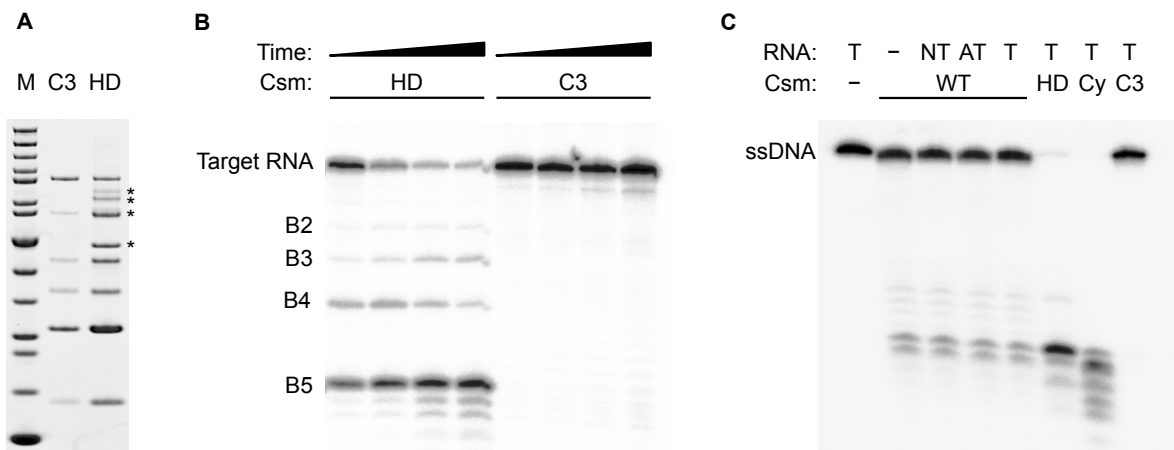

**Figure S3. In vitro analysis of Csm HD mutant.** (A) SDS-PAGE of purified Csm3 D35A (C3) and Cas10 H18A/D19A (HD) variant interference complexes; \*: contaminants; M: PageRuler Unstained (Fisher Scientific). (B) Target RNA backbone cleavage by Csm3 D35A (C3) and Cas10 H18A/D19A (HD) variant interference complexes; 5'-radiolabeled target RNA was incubated with HD or C3 in the presence of  $Mg^{2+}$  for 5, 10, 30, 60 min at 30 °C; as expected the characteristic cleavage products B2 – B5 are produced by HD but not the C3 variant. (C) The ssDNase activity of Csm interference complex is not dependent on RNA substrate or active site mutations; 5'-radiolabeled ssDNA was incubated with Csm wild type (WT), HD, Cas10 D630A/D631A (Cy), or Csm3 D35A (C3) in the presence of  $Mg^{2+}$  for 90 min at 30 °C; cold RNA was added as indicated.  $Mn^{2+}$  and  $Co^{2+}$  also supported the observed activity,  $Zn^{2+}$  less so, and  $Cu^{2+}$  did not stimulate DNase activity (data not shown). T: target RNA, NT: non-target RNA, AT: anti-tag RNA.

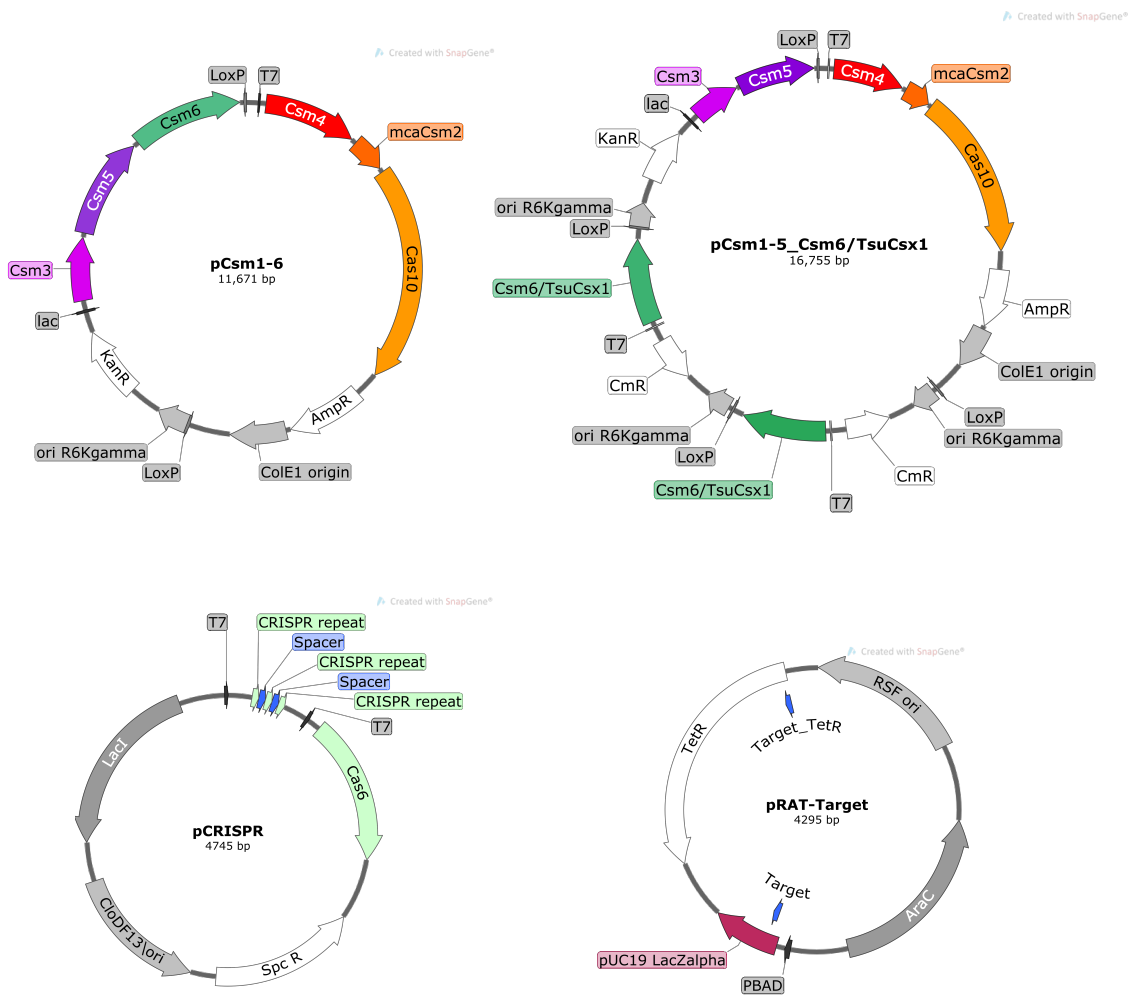

**Figure S4.** Selected plasmid maps for constructs used in plasmid immunity assays. In pRAT-Target, the blue arrows indicate the positions of the match to crRNA targeting the pUC19 LacZ $\alpha$  MCS (Target) or the tetracycline resistance gene (Target\_TetR).

**Table S1: Plasmids constructed in this study**

| Name          | Genes                                                                                                     | Resistance      | Notes                                                                                                                                                                                 | Use                                    |
|---------------|-----------------------------------------------------------------------------------------------------------|-----------------|---------------------------------------------------------------------------------------------------------------------------------------------------------------------------------------|----------------------------------------|
| pCsm1-5       | <i>csm1</i> , <i>csm2</i> , <i>csm3</i> ,<br><i>csm4</i> , <i>csm5</i> ,<br><i>Mca_csm2</i>               | Amp, Kan,<br>Cm | MultiColi™ pACE, pDK, pDC recombination; ColE1 ori; pT7 ( <i>csm1</i> , 2, 4 on pACE), pLac ( <i>csm3</i> , 5 on pDK), pT7 ( <i>Mca_csm2</i> on pDC), TEV-cleavable N-His tag on Csm4 | Protein production and purification    |
| pCsm1-5_C3    | <i>csm1</i> , <i>csm3</i> D35A,<br><i>csm4</i> , <i>csm5</i> ,<br><i>Mca_csm2</i>                         | Amp, Kan        | MultiColi™ pACE and pDK recombination; ColE1 ori; pT7 ( <i>csm1</i> , 4, <i>Mca_csm2</i> on pACE), pLac ( <i>csm3</i> , 5 on pDK), TEV-cleavable N-His tag on Csm4                    | Protein production and purification    |
| pCsm1-5_Cy    | <i>csm1</i> D630A<br>D631A, <i>csm3</i> ,<br><i>csm4</i> , <i>csm5</i> ,<br><i>Mca_csm2</i>               | Amp, Kan        | as pCsm1-5_C3                                                                                                                                                                         | Protein production and purification    |
| pCsm1-6       | <i>csm1</i> , <i>csm3</i> , <i>csm4</i> ,<br><i>csm5</i> , <i>csm6</i> ,<br><i>Mca_csm2</i>               | Amp, Kan        | pLac ( <i>csm3</i> , 5, 6), otherwise as pCsm1-5_C3                                                                                                                                   | Plasmid immunity assay                 |
| pCsm_Control  | -                                                                                                         | Amp, Kan        | pACE and pDK recombination                                                                                                                                                            | Plasmid immunity assay; vector control |
| pCsm1-5_ΔCsm6 | <i>csm1</i> , <i>csm3</i> , <i>csm4</i> ,<br><i>csm5</i> , <i>Mca_csm2</i>                                | Amp, Kan        | as pCsm1-5_C3                                                                                                                                                                         | Plasmid immunity assay                 |
| pCsm1-6_C3    | <i>csm1</i> , <i>csm3</i> D35A,<br><i>csm4</i> , <i>csm5</i> , <i>csm6</i> ,<br><i>Mca_csm2</i>           | Amp, Kan        | as pCsm1-6                                                                                                                                                                            | Plasmid immunity assay                 |
| pCsm1-6_Cy    | <i>csm1</i> D630A<br>D631A, <i>csm3</i> ,<br><i>csm4</i> , <i>csm5</i> , <i>csm6</i> ,<br><i>Mca_csm2</i> | Amp, Kan        | as pCsm1-6                                                                                                                                                                            | Plasmid immunity assay                 |
| pCsm1-6_HD    | <i>csm1</i> H18A D19A,<br><i>csm3</i> , <i>csm4</i> , <i>csm5</i> ,<br><i>csm6</i> , <i>Mca_csm2</i>      | Amp, Kan        | as pCsm1-6                                                                                                                                                                            | Plasmid immunity assay                 |
| pCsm1-5_Csm6  | <i>csm1</i> , <i>csm3</i> , <i>csm4</i> ,<br><i>csm5</i> , <i>csm6</i> ,<br><i>Mca_csm2</i>               | Amp, Kan,<br>Cm | pACE, pDK, pDC recombination; pT7 ( <i>csm6</i> on pDC), otherwise as pCsm1-5_C3                                                                                                      | Plasmid immunity assay                 |
| pCsm1-        | <i>csm1</i> , <i>csm3</i> , <i>csm4</i> ,                                                                 | Amp, Kan,       | as pCsm1-5_Csm6 but                                                                                                                                                                   | Plasmid immunity                       |

|                      |                                                                               |     |                                                                     |                                                                                                                         |
|----------------------|-------------------------------------------------------------------------------|-----|---------------------------------------------------------------------|-------------------------------------------------------------------------------------------------------------------------|
| 5_tsuCsx1            | <i>csm5</i> , <i>Mca_csm2</i> ,<br><i>Tsu_csx1</i>                            | Cm  | <i>Tsu_csx1</i> instead of <i>csm6</i>                              | assay                                                                                                                   |
| pCRISPR              | <i>cas6</i> , pUC MCS-<br>targeting CRISPR<br>array (3 repeats, 2<br>spacers) | Spc | pCDF-Duet-1 derivative;<br>CRISPR in MCS-1, <i>cas6</i> in<br>MCS-2 | crRNA biogenesis,<br><i>in vitro</i> and <i>in vivo</i>                                                                 |
| pCRISPR_TetR         | <i>cas6</i> , TetR-targeting<br>CRISPR array (5<br>repeats, 4 spacers)        | Spc | as pCRISPR                                                          | crRNA biogenesis,<br><i>in vivo</i>                                                                                     |
| pRAT                 | -                                                                             | Tet | RSF ori; pBAD                                                       | Plasmid immunity<br>assay; control<br>plasmid for pUC<br>MCS-targeting Csm,<br>target plasmid for<br>TetR-targeting Csm |
| pRAT-Target          | pUC19 <i>lacZ<math>\alpha</math></i>                                          | Tet | as pRAT                                                             | Plasmid immunity<br>assay; target<br>plasmid for pUC<br>MCS-targeting Csm                                               |
| pCas6-CHis           | <i>cas6</i>                                                                   | Kan | pEHisTEV-derivative; C-<br>terminal His-tag                         | Protein production<br>and purification                                                                                  |
| pEHisTEV-<br>Csm6    | <i>csm6</i>                                                                   | Kan | pEHisTEV-derivative; TEV-<br>cleavable N-His tag                    | Protein production<br>and purification                                                                                  |
| pEHisTEV-<br>TsuCsx1 | <i>Tsu_csx1</i>                                                               | Kan | pEHisTEV-derivative; TEV-<br>cleavable N-His tag                    | Protein production<br>and purification                                                                                  |

**Table S2 Oligonucleotides and primers used in this study**

| <b>Name</b>     | <b>Sequence 5' → 3'</b>                                                                        | <b>Notes</b>      |
|-----------------|------------------------------------------------------------------------------------------------|-------------------|
| mtbCRISPR array | ggattcggatcctctagagtcgGTCGTCAGACCCAAAACCCCGAGAGGGGA<br>CGGAAACGaattcgagctcggtagccggggatccctagg | dsDNA             |
| mtbCA_Rep-5'_t  | catggaatagCACGCTGGACGAATTGTCCATAGA                                                             | 5'-P <sub>i</sub> |
| mtbCA_Rep-5'_b  | CTCGGGGTTTTGGGTCTGACGACTCTATGGACAATTCGTCCAGC<br>GTGctattc                                      | 5'-P <sub>i</sub> |
| mtbCA_Rep-3'_t  | GTCGTCAGACCCAAAACCCCGAGAGGGGACGGAAACgactctaccg                                                 | 5'-P <sub>i</sub> |
| mtbCA_Rep-3'_b  | tcgacggtagagtcGTTTCCGTCCCCT                                                                    | 5'-P <sub>i</sub> |
| mtbCA_TetR-Sp_t | GTCGTCAGACCCAAAACCCCGAGAGGGGACGGAAACtgacggtgccg<br>aggatgacgatgagcgcattgttaga                  | 5'-P <sub>i</sub> |
| mtbCA_TetR-Sp_b | CTCGGGGTTTTGGGTCTGACGACtctaacaatgcgctcatcgtcatcctcggcac<br>cgtcaGTTTCCGTCCCCT                  | 5'-P <sub>i</sub> |
| NdeInsFor       | gtttaacttaagaaggagatatacatatg                                                                  | SLIC              |
| SmaBamCas10     | GAATTCAGTGGCCGTCGTTTTACAggatcctcattccgattcttc                                                  | SLIC              |
| BamSmaACYC      | GGATCCTGTAAAACGACGGCCAGTGAATTctttaataaggagatataccatg<br>gctc                                   | SLIC              |
| SacHindCsm2     | GCTCGACTGGGAAAACCCTGGCGAAGCTTctcactgtctttcgggtcc                                               | SLIC              |
| HindSacACYC     | AAGCTTCGCCAGGGTTTTCCAGTCGAGctttaataaggagatataccatgg<br>ctc                                     | SLIC              |
| XhoT7Cas10      | CTTTGTTAGCAGCCGGATCTCTCGAGctcattccgattcttctttacg                                               | SLIC              |
| XhoForT7        | ctcgagagatccggctgctaacaag                                                                      | SLIC              |
| XhoForLac       | ctcgagactagtccgtttaaaccc                                                                       | SLIC              |
| NdeVecRev       | catatgtatatctccttctaaagttaaac                                                                  | SLIC              |
| SmaBamCsm3      | GAATTCAGTGGCCGTCGTTTTACAggatcctcaaaccgctgcc                                                    | SLIC              |
| XhoLacCsm5      | GGGTTTAAACGGAAGTAGTCTCGAGctcactctgcacgacggatg                                                  | SLIC              |
| SacHind_mcaCsm2 | GCTCGACTGGGAAAACCCTGGCGAAGCTTctcattcggtttctttgctgg                                             | SLIC              |
| SacHindCsm5     | GCTCGACTGGGAAAACCCTGGCGAAGCTTctcactctgcacgacggatg                                              | SLIC              |

|                              |                                                    |                      |
|------------------------------|----------------------------------------------------|----------------------|
| XhoLacCsm<br>6               | GGGTTTAAACGGAAGTCTCGAGctcaaccaatggtgcatg           | SLIC                 |
| NcoInsFor                    | ccctctagaataattttggttaacttaagaaggag                | SLIC                 |
| CDFInsRev                    | CTTTGTTAGCAGCCGGATCTCTCGAgttcaaatttcgagcagcgg      | SLIC                 |
| NcoVecRev                    | ctcctcttaaagttaacaaaaattatttctagaggg               | SLIC                 |
|                              |                                                    |                      |
| Csm3_D35A<br>-fw             | cgccgttgCtaaaccggtagttcgtgatc                      | Muta-<br>genesi<br>s |
| Csm3_D35A<br>-RP             | ccggtttaGcaacggcgccaattgcagaa                      | Muta-<br>genesi<br>s |
| Cas10_H18<br>A_D19A-f        | gcttactgGCcgCtattggaaagcctgttcagc                  | Muta-<br>genesi<br>s |
| Cas10_H18<br>A_D19A-RP       | ttccaataGcgGCCagtaagcagcctataatcg                  | Muta-<br>genesi<br>s |
| Cas10_D630<br>A_D631A-fw     | cggtggggCtgCtgtgtttgttgggggcat                     | Muta-<br>genesi<br>s |
| Cas10_D630<br>A_D631A-<br>RP | caaacacaGcaGccccaccggaataaatgatg                   | Muta-<br>genesi<br>s |
|                              |                                                    |                      |
| ara-NdeI-R                   | ACGTCCATATGgtattcctcctgtagccc                      | Primer               |
| ara-AvrII-F                  | GACTCCTAGgagctgcatgtgcagagg                        | Primer               |
| TetR-FOR                     | GATCGCATGcatctaattggactagtagcccgctaag              | Primer               |
| TetR-REV                     | CTTAGGATCCGTtcaggtcgaggtggcccggc                   | Primer               |
| RSFara-<br>FOR               | caaatagcatgcagcgtcttc                              | Primer               |
| RSFara-REV                   | cttaggatccCTTGTCGTCGGTTCAGGGCAG                    | Primer               |
| lacZ-pRAT-<br>fw             | gttttttgggctagcaggaggaatacCCATGGGCACCATGATTACGC    | Primer               |
| lacZ-pRAT-<br>RP             | agcagcggtttcttaccagactcgaGCTATGCGGCATCAGAGCAG      | Primer               |
|                              |                                                    |                      |
| mtbRepeat<br>RNA             | uGUCGUCAGACCCAAAACCCCGAGAGGGGACGGAAAC              | 5' 6-<br>FAM™        |
| target RNA                   | AAcgacucuagaggauccccggguaccgagcucgaaauucCAAAGGCA   | RNA                  |
| anti-tag RNA                 | AGGUcgacucuagaggauccccggguaccgagcucgaaauucGUUUCCGU | RNA                  |



|            |                                                   |     |
|------------|---------------------------------------------------|-----|
| P1.A26 RNA | agggucguuguuaagaacgacguuguuagaaguuggguauugguggaga | RNA |
| A1 RNA     | aggguaauuuuguuuguuuucuuaaacuuaagcuaguucuggaga     | RNA |

**Table S3 Sequences of synthetic genes**

| Name                                             | Sequence 5' → 3'                                                                                                                                                                                                                                                                                                                                                                                                                                                                                                                                                                                                                                                                                                                                                                                                                                                                                                                                                                                                                                                                                                                                                                                                                                                                                                                                                                                                                                                                                                                                                                                                                                                                                                                                                                                                                                                                                                       |
|--------------------------------------------------|------------------------------------------------------------------------------------------------------------------------------------------------------------------------------------------------------------------------------------------------------------------------------------------------------------------------------------------------------------------------------------------------------------------------------------------------------------------------------------------------------------------------------------------------------------------------------------------------------------------------------------------------------------------------------------------------------------------------------------------------------------------------------------------------------------------------------------------------------------------------------------------------------------------------------------------------------------------------------------------------------------------------------------------------------------------------------------------------------------------------------------------------------------------------------------------------------------------------------------------------------------------------------------------------------------------------------------------------------------------------------------------------------------------------------------------------------------------------------------------------------------------------------------------------------------------------------------------------------------------------------------------------------------------------------------------------------------------------------------------------------------------------------------------------------------------------------------------------------------------------------------------------------------------------|
| <i>mtb_cas6</i><br>(with additional 5' sequence) | <p>catatgaccgagcatctgtcacgacttactctgacgctggaagtggacgcgccgctggaacgcgctcgggtc<br/> gccacctgggcccgcacctgcacggagctctgatggagtccattcccgcgattacgttcaaacctgcata<br/> ccgtgccagtgaaaccttactcacagtagccctggctgcagcaccacaagcttagaatgaaaaatctcg<br/> accttgacgaacgaagcccggcaacagattgtgggcccgattaatgatgcggcgttcgcggggttcagact<br/> gcgcgccagcggcatcgccaccaggtaaccagccgcagtttggacaaaaatcctctctgcagttcggcc<br/> gtatctttatgctgccccgaaacacggaaattccgtgtggaattcctgacaccaccgcttcaagcagagt<br/> ggcgaatatgtttggccggaccgcgactgtattccaatctctggctcaaaagtatggcgcgatcgtgga<br/> cggggaagaaccggaccctggtctgatcgccaatttggcagagcgtgcgtttatcagcttccgtgttcgt<br/> ccgacaccttgcagtggtgctgcccgcgtgccaggcttcacaggcagcgtacgttactgttcgcggtgtt<br/> gatacgttcgcgagttacattgctgctctgctgtggttgggaatttagcgggtgtggtattaaagcctctatgggt<br/> atgggcgaatccgtgtgcagcccctggcaccgagggaaaaatgcgtacaaaaacctctcgag</p>                                                                                                                                                                                                                                                                                                                                                                                                                                                                                                                                                                                                                                                                                                                                                                                                                                                                                                                                                                                                                                                    |
| <i>mtb_cas10</i>                                 | <p>ccatggctcataatgaacccccagttgatcgaagcgattataggctgcttactgcacgatattgaaagcctgtt<br/> cagcgcgcggcactgggttatccgggtcgtcactccgcgatcggctcgtgcctttatgaaaaagatggctgc<br/> gagattcacgtaacccctctcagttaccgatgaagttagtaggctgacattggcgttagtgatcgtcgcattct<br/> ggacgccattagctaccatcattcctcggcactgcccaccgcccggagaatggtcgttagcccgggacg<br/> cgccagcttatattgctataacatcgccgctggcaccgaccgtcgaaagccgacagcgcgatgggcat<br/> ggtgccagcacctgggaccagatacccccttatactctatgttcaatcgcttcggtagtggaaccgtaacct<br/> ggcatttgcctcagaaatgctggacgaccgtaagccatcaacatccctagcccgcgctatagaattgat<br/> aaagatcgttatgcggcgatttgaataaaactcaaagcgattctggtgatcttgagcgttcggatacctacctc<br/> gcctcattataaatgtgctggaggcgaccctgagcttctgcccagcagtagcggatgccagcgaagtcgttg<br/> atgttagctttttgatcatctaaactgaccggagcactggcgcttgatatggcattacctgcaagctactggt<br/> caaagcgttttaaatcagccctcttgataaacaagacacctttacaatgaaaaagcgttttactgacgacc<br/> ttcgacgtgcaggcattcaagactttattatacattcactcaagcggcgtgcaaaaatgctcgtgcacgt<br/> agcttctatctgagatgctgacggaacacttaatcgacgaattgctggcgcgtgctggactgtcacgcgcga<br/> atctcaactattccggcggcggtcatgctatctttgcttccgaactgaaagcgcgctaagtcagttgaac<br/> agtttgaacgtgaagcaaatgattggttacttgaataatcgcacccctctgtttattgcgactggctcgttacct<br/> ctggcggtaacgacctatgctgcccccaacgaatcggcctctcaggcctctaatcgcgactgcgctatt<br/> caggcctgatagagaactcagcgaacagctgtcagcaaaagaaactggcccgtactctgcccaccagct<br/> gcgcgagctgaacagctgtagatgacggcagaaaggagaccgtgaatttctgtgtgccacactgtgaa<br/> ccgaacggtgtcagcggatgacgaaccgaaatgtagccttggcaggcgtgacggccgacgctgcag<br/> atacagtcgagagtcgccccttttctcatttcggacggagccactaaaggccttccgttaccgttcggcgt<br/> acgctgactttctgttcgcgcgagacgcagataaagcattgcaacaaccccagacgcgcccgggtatgc<br/> taaaaacaagttcttgcggcgcaatgcttaggcaccgggctctgggtagggtgattatgttcccagatggagt<br/> tcggcgattacgtgaagcgggctcgggtattgctgcctggcgtcctgctgctggacgtcgataacctgggc<br/> caggcgtttacacatggtttcatggagcagggaaatggcaagtttaataccatcagccgacccgcttttc</p> |

|                 |                                                                                                                                                                                                                                                                                                                                                                                                                                                                                                                                                                                                                                                                                                                                                                                                                                                                                                                                                                                          |
|-----------------|------------------------------------------------------------------------------------------------------------------------------------------------------------------------------------------------------------------------------------------------------------------------------------------------------------------------------------------------------------------------------------------------------------------------------------------------------------------------------------------------------------------------------------------------------------------------------------------------------------------------------------------------------------------------------------------------------------------------------------------------------------------------------------------------------------------------------------------------------------------------------------------------------------------------------------------------------------------------------------------|
|                 | <p>tcgatgtgtcgcgtgttcttccgccagcacatcaactatgtgctggcacgtccgaaactacgcccgattaccgg<br/> agacgatccggcccggccgctgaagcaaccatcatttattccggtggggatgatgtttgttgggggcat<br/> gggatgatgttattgaatttgatcagagctgcgcgaacgcttccatgaattcacgcaaggtaaaactaccgat<br/> ctgccgggatcggatgttccggacaagatcctattagtgtgatggccgcgaagtgggggacttagaaga<br/> cgccgctaaatctctgcctggaagaatggcgtgcattattgatcgtgaattcacittcgggtgggacgagctc<br/> cttctaaggatgaagaaaagtatcgcatatcgagattatcttccggcaacgaggaacgcggtatggc<br/> gtttattataaactgtagaacttgcggagcgggatgatcgtattaccaagcaagggtgggtgactttctga<br/> ctcgcatgcgaatcctacgggcatcggccccctccaacagttcgtaaccgttacatcaatggttcag<br/> gacccgactgatgccaacaactcaaacggcactgcacctatattaccgcacacgtaagaagaatc<br/> ggaatgaggatccctcgag</p>                                                                                                                                                                                                                                                     |
| <i>mtb_csm2</i> | <p>ccatggctcatatgagtgatcattcaggacgattatgtgaaacaggccgaggatcgtgggctgcaaaaa<br/> agaaaaatggattcgagctgaccaccacgcaattacgcgtgctcctgtccctgacggcccagctgttgacg<br/> aagcacaacagtcggccaatccgacgctgccgcagctaaagaaaaagttcagatctcgtgtgctgcg<br/> ttcgtgtaccagtcggccgtgaagatgccgtgaaaacctcgtacgcaatgcgaagctgttgaagctctag<br/> aaggaattggcagctcgcgtgatggccttctacgttttccgatatatggaagcgtcgtgcatacaaaaag<br/> tacctggacccgaaagacaagtgaggatccctcgag</p>                                                                                                                                                                                                                                                                                                                                                                                                                                                                                                                                                     |
| <i>mtb_csm3</i> | <p>ccatggctcatatgactacgagctacgaaaaatcgaaactggtacgctgactgtcctgacgggcttca<br/> gatcggcgtggcgtgagtttctgcaattggcgcggtgataaacggtagttcgtgatccgctgagtcggct<br/> gcctatgatccccggtagctctctaaaggtaaagtcgcacgttattgtctcgcagtagcggggcggacacc<br/> gagacattctaccgaaaccaaacgaagatcatgccatattcgacgtttattcggcgatacggagaatata<br/> atgaccggtcgcctgtgttcagagacaccaaactgaccaacaagatgacctgaggcgcgggggcta<br/> aaacctgacggaagtaaaattcgaaacgctattaaccgtgtgacggctaaagcgaactacgccagatg<br/> gagcgtgtgattccagggtctgaattgcctttcgttggctatgaagtcagtttggtagccaggtgaagaac<br/> agaaagcctcttaccttctgacgaaattatcgaagactttaatgccattgcccgcggtgaaattattaga<br/> attagactatttagcggctctggcaccgcggtacggtcaggtaaatctcgaacctgaaagcacgagcc<br/> gcggtagggtccctggatggctcactcctggaaaagctcaaccacgaactggcagcggtttaggatccctc<br/> gag</p>                                                                                                                                                                                              |
| <i>mtb_csm4</i> | <p>ccatggctcatatgaactcacggctgttctgtttgatttcgatcgtacgcacttcggcgatcacgggctgaaa<br/> gctcaaccatcagttgtccggctgatacgtgtattcggcgtttgtgcaagccctgcgcatggggggccaa<br/> cagctgctcggagagttgtagcctgtagtactgcgcctgacggatctcctccatacgttggacctgacta<br/> cctggtcccaagccattgcattcagtcgcagtgacggctccagatgcaaaaaagctggcaagaaga<br/> tcggattcctgctgctgcgagctgggtccttctgacggaccgcgacttgaaagaactggctgcgct<br/> cagacaaaatggagtcattgccgttccggcaaacggccatccataacggaaaaaggtgagatcagatc<br/> cgatcagagtggtctatttccgttcgagctagacgcaggctctggctgctgcaaccgtagtgagagcga<br/> gttgggttctgacgcgcttctcaaaaggtatctctgctctggggcggagaacgaacgtccggcttccgctc<br/> caatctcaccgagagtgaagctcctgctgcctcacaccgaccgtcagtgagctagctaatgaccttact<br/> acctccctgctactgatgacgaactcgaagccgcttagccggcgcgacttatcgttggtaaacgtagcg<br/> ggtttgtagctccagctacatgccgatgcttgcgcaagcgtgatctataaattcgtgctggatctgtgt<br/> ttccgcccgttccaggtggtattctggatgtaagcttagcggtaatcatccggtctattcgtatgctgccc<br/> ctgttctgctgctccagaaagtgcagatgaggatccctcgag</p> |
| <i>mtb_csm5</i> | <p>ccatggctcatatgaactacctgaagccattcagagctgacgctgcgtgtggtggccctgttcttattggcag<br/> cggcgagaacaggactagcaagaataccatgttgaaggtagccgctgtacttctgatatggaactgct</p>                                                                                                                                                                                                                                                                                                                                                                                                                                                                                                                                                                                                                                                                                                                                                                                                                               |

|                 |                                                                                                                                                                                                                                                                                                                                                                                                                                                                                                                                                                                                                                                                                                                                                                                                                                                                                                                                                                                                                                                                                                                                                                                                                                                                                                                                                           |
|-----------------|-----------------------------------------------------------------------------------------------------------------------------------------------------------------------------------------------------------------------------------------------------------------------------------------------------------------------------------------------------------------------------------------------------------------------------------------------------------------------------------------------------------------------------------------------------------------------------------------------------------------------------------------------------------------------------------------------------------------------------------------------------------------------------------------------------------------------------------------------------------------------------------------------------------------------------------------------------------------------------------------------------------------------------------------------------------------------------------------------------------------------------------------------------------------------------------------------------------------------------------------------------------------------------------------------------------------------------------------------------------|
|                 | <p>ctatgctgacattccagctcacaaaagaaaaagcttgaagccttgcgaatgaacacggacggagcaca<br/> gcaacggcaccactgaaagagtgggtagagccaaatgctgcaaatagatccggccaagcatcggtgct<br/> acgaagttaaattggcagcatcgaacctcgccggcctctctggtggccgaggtggtcgtatgactcgaaga<br/> aactgactctaaacgaaatcacgcttcatcaagaccgctgggtcgccgtactgcccgggtccacggt<br/> aaaaggcatgttgcgctcaatctatctgcaaagtctggtacacaaacgcacagcgcaaccggctacggttcc<br/> gggccaccagacgcggaacaccgtaatacggtagcgcttcgagcgaaggaactccgcaagagcg<br/> gggcccccaatacgggccccaggatgctgtaatgatctgttccaggcgattcgggttaccgattctccggc<br/> cttacgtacaagcactgctgattgtcagaaaatggacatgaacgttcatggcaaaccggacggcctgcc<br/> gctttccgcaatgcttgcgctggcactagcatctcacatcgtgtggtggtgacacctccccacggcgc<br/> gtggaggctggcgtgaaggcgaacgattcctggaaacgctcgcagaaacggctgccagcgtcaaccaag<br/> ctcgttacgccgagatcgcgcatgatccaggcgttaacgcgatcgtaggccctatcgtatacttaggaggt<br/> ggggcaggctaccgacgaagactttgtgaccgaccaggatgacatggccaaagtcttagacgctcaatt<br/> ggtaaagttgtgaaacacgtggacaaaaccgtaattgctgtttccccgctggttgaagcgaacaaaa<br/> tcgataatattgtatgaaatggccaatggaactcagcatccgctgctgcagagtgaggatccctcgag</p>                                                                                                                                                                                                                                                                   |
| <i>mtb_csm6</i> | <p>ccatggctcatatgatcctgttagcccgattgggaccgcatccgatcactgcgctggcgatggtcccag<br/> ctgcatattgtgagacattatcgtcctattgtggtcgtgctgttctgagtcagagatcggcctcgagaacg<br/> cggatcgtcgtactccgcggtattacgctttagctccggaaccgacgtgcgattgtgactatacgaat<br/> ccaagcgttaccgggttgacctgttctcgtgttccgtaaccatttagggaattaagcgcagaattccccga<br/> ccgacgatcctgttgaacaccagtagcggtagcctgcatgcaagcagcactttagccattaacgtattt<br/> ggcatcccgcgtacaacggctgtacaagtgcgacccccggccgctgcttaaacagggggatcgcg<br/> aaagtctgatgcttacgacctggaattaatgtgggatgcgaatgatgacaatcagccgggtgccctaacc<br/> gttgccttgaagccacatcggccgctgggcccctgctggaacgtgccaatcgaacaactgattgttag<br/> ctatgactattcggccgctgtgaccatcgtcgcagatagccggctgccggaccaagttcgaatctaattcgcg<br/> gtgcaatgcatcgtagctcgtcgaacatcgtgttccccaaattctcaagacaccgcattcacctatgac<br/> ccggtaacaaagttgccgaatacatcagtgcaactgttattggccaaacgcgaacaatgggcagaatttg<br/> cgcgtagtccaccccgcaattacaattgttctcgcgcccggctgctaagcacctgccggaagatcgat<br/> acctggatgatatgggtcgtgtgatcggcgaagctggagcgtgaaccagaaatcgcctgcactaaagc<br/> atccgcctaaaagtccgaatgcggaatggtatctgtacaccaaagattggttagccctctgcgcaattg<br/> cctgatcgtgtgggtgcgtagaggtctgggcccgttcgagtcgctgtgtaataccggcgcgatgaaat<br/> tgtcagcatctcggaggatcgatcaccaaagatggcggcctactgccgaacagctgctgaagatttagcc<br/> cgtgaaacgggcgagatcaacctgtacgatcgtcgaacgatgaaattatacgcagattgacatggca<br/> ccattgggtgaggatccctcgag</p> |
| <i>mca_csm2</i> | <p>ccatggctcatatgagcgtgattcaggatgattatgtgaaacaggcggaaacagggtattcgcggcctgccga<br/> aaaaaacggcgatttgaactgaccaccaccagctgcgctgctgctgagcctgaccgcgagctgttg<br/> atgaagcgcagctgagcagcagatcagaacctgagcccggcgtcgcgataaagtgcagtatctgcgct<br/> gctgttctgtatcaggcggccgcaaaaagcggctgcgctgttctggaacgcgcccgtctggtatga<br/> actggcgcagattggcagatagccgcatcgcctgctgaaatttgcattatatggaagcgtggtggcgtata<br/> aaaaattctgatccgaaagaaccagcaagaaccgaatgaggatccctcgag</p>                                                                                                                                                                                                                                                                                                                                                                                                                                                                                                                                                                                                                                                                                                                                                                                                                                                                                                          |
| <i>Tsu_csx1</i> | <p>ccatggatcgccatactcttatcacattcttagcacaaggagctcgcgatccaataccgggtatcgtagtacg<br/> acgtaccgcttgcagatcgcgaccgttccgggtcgcttttggactgcttctgcacaacacctggctccagatc<br/> gcttactgatctgggaaccgctctccagtgggatctgttagttgagagtttagcagggtcgggggaggat<br/> gaagaagctcgttggcgttgaatggaacggctgagcgaaggcgcagtgacccacgcttgttagaacgtgtt</p>                                                                                                                                                                                                                                                                                                                                                                                                                                                                                                                                                                                                                                                                                                                                                                                                                                                                                                                                                                                                                                  |

cgcccttaatggaacgcgcggtcggcatccattaacccgctgctgattcctttggggaagcccaagatga  
gcagctgcaatcttagacactattgcaactcatgtccgggtggcgaagttccttgacctgacgcatggttc  
cgccacatgggatgctggggtcctttctgctcatgttgagcgtattggacacctcgtgtcgtggtctttg  
tatggcgcttagatatgtcacgcgataatatacgcagttgtccgtctggatgggttatcagcggccgctcatt  
ggattgaagcacttcccacttgaagcaactggcgattatggtgtgtcgaagcctgttgtagcggatggcg  
tggcagaggataaagccgcttagaggaagctgcatcaccgaacgcacttcaattgttgatgccgttc  
gtaagttgctacgttctgccggtcttgataccccattgggtggcgttagcggacttttcaggccgtgtgta  
cgccactagaatggagtcgcaatctctctggacgctatcagaagcgtgtcacgcgcttacctgcacat  
gggagattttgctgcgcgcttattcttgctgggaggctgttatcacacgtcactgtcttgcgaccggccgtgat  
ccgctgacttcgattgggtcgcaaggctgaggctgaagatttagacgcgacggttcgtaacggattcgcg  
atcgcgattttgacaagcctattggactattaagaactgctgaattcgtggccacgggaaccacaaaa  
agataaggatctctgcgcgtattgaaatccgaacaggatactcgtcgttcattactgagtccttacaacgcct  
tttagactgaggatcc
